# Supplementary material for: Synthesis, characterization and exploration of photovoltaic behavior of hydrazide based scaffolds: a concise experimental and DFT study
Source: Royal Society of Chemistry journal article supplement (doi:10.1039/d3ra00431g), 2023-01-01
Supplement: d3ra00431g1.pdf [file d3ra00431g1.pdf]

## Synthesis, Characterization and Exploration of Photovoltaic Behavior of Hydrazone Based Scaffolds: A Concise Experimental and DFT Study

Muhammad Haroon<sup>\*a,b</sup>, Tashfeen Akhtar<sup>\*a</sup>, Muhammad Khalid<sup>c,d</sup>, Hasnain Mehmood<sup>a</sup>, Muhammad Adnan Asghar<sup>e</sup>, Rabia Baby<sup>f</sup>, Raha Orfali<sup>g\*</sup>, Shagufta Perveen<sup>h</sup>

<sup>a</sup>Department of Chemistry, Mirpur University of Science and Technology (MUST), 10250-Mirpur (AJK) Pakistan.

<sup>b</sup>Department of Chemistry, Government Major Muhammad Afzal Khan (Shaheed), Boys Degree College Afzalpur, Mirpur (Affiliated with Mirpur University of Science and Technology (MUST), 10250-Mirpur (AJK) Pakistan).

<sup>c</sup>Institute of Chemistry, Khwaja Fareed University of Engineering & Information Technology, Rahim Yar Khan, 64200, Pakistan.

<sup>d</sup>Center for Theoretical and Computational Research, Khwaja Fareed University of Engineering & Information Technology, Rahim Yar Khan, 64200, Pakistan.

<sup>e</sup>Department of Chemistry, Division of Science and Technology, University of Education Lahore, Pakistan

<sup>f</sup>Department of education, Sukkur IBA university, zip code. 65200

<sup>g</sup>Department of Pharmacognosy, Collage of Pharmacy, King Saud University, PO Box 2457, Riyadh 11451, Saudi Arabia

<sup>h</sup>Department of Chemistry, School of Computer, Mathematical and Natural Sciences, Morgan State University, Baltimore, MD, 21251, USA

\*Corresponding author's E-mail addresses:

Muhammad Khalid ([muhammad.khalid@kfueit.edu.pk](mailto:muhammad.khalid@kfueit.edu.pk); [Khalid@iq.usp.br](mailto:Khalid@iq.usp.br))

Tashfeen Akhtar ([tashfeenchem@must.edu.pk](mailto:tashfeenchem@must.edu.pk)),

Raha Orfali ([rorfali@ksu.edu.sa](mailto:rorfali@ksu.edu.sa))

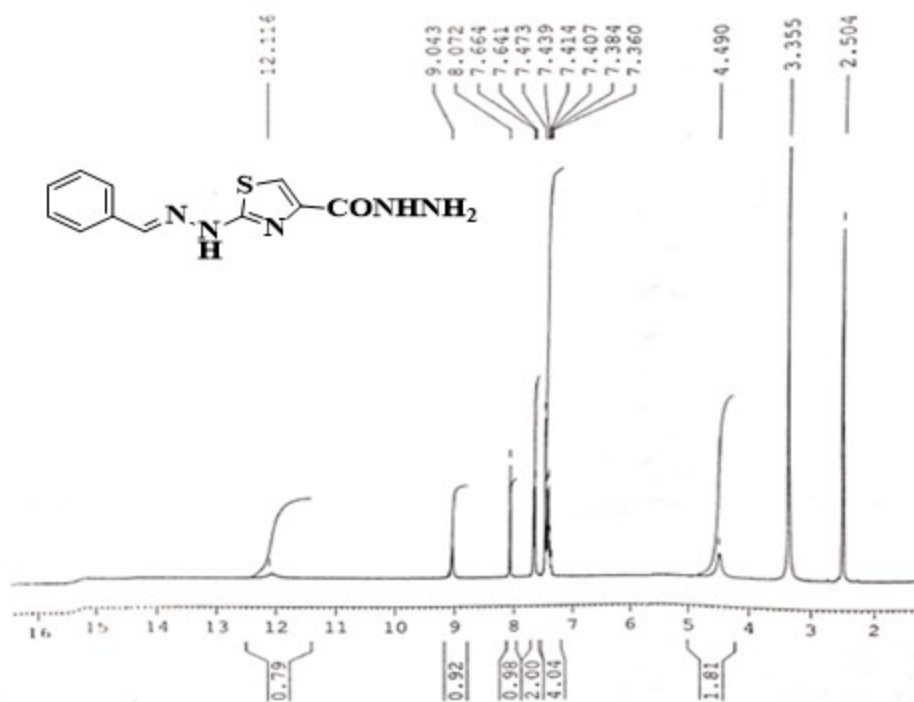

Figure S1: <sup>1</sup>H-NMR spectrum of BDTC1

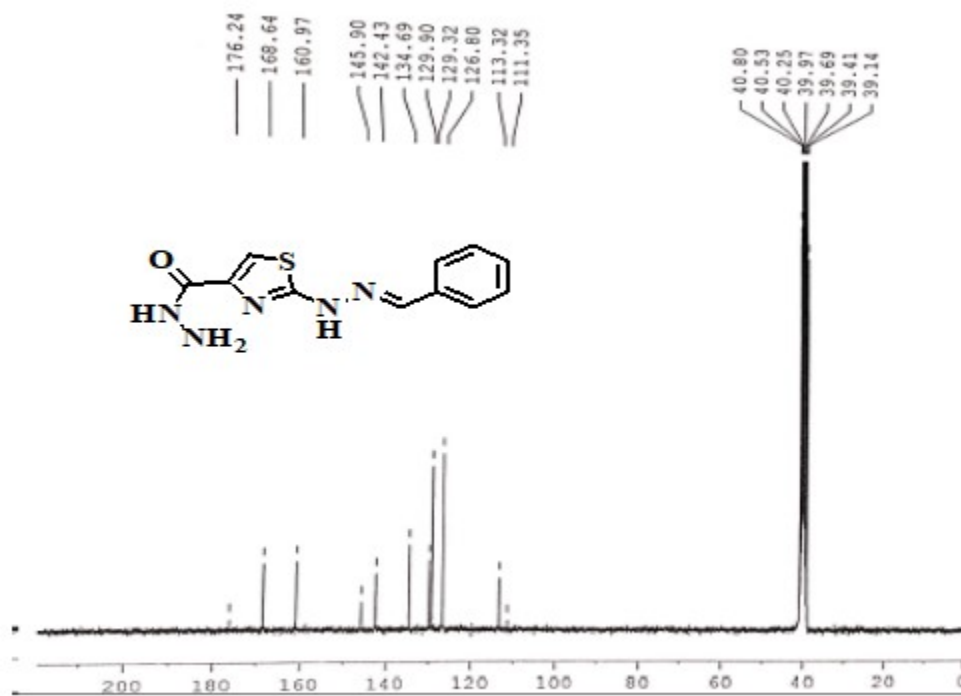

Figure S2: <sup>13</sup>C-NMR spectrum of BDTC1

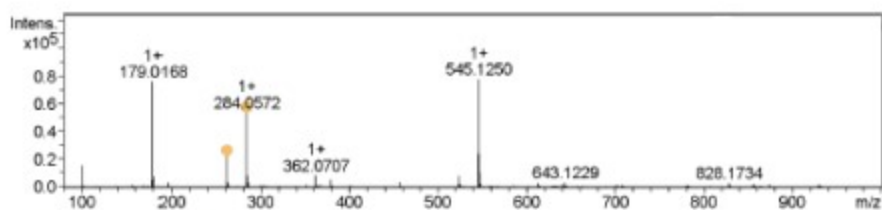

| #  | m/z      | I %   |
|----|----------|-------|
| 1  | 101.0019 | 20.7  |
| 2  | 179.0168 | 97.6  |
| 3  | 180.0189 | 6.3   |
| 4  | 181.0133 | 9.6   |
| 5  | 196.0258 | 4.1   |
| 6  | 262.0753 | 28.9  |
| 7  | 263.0778 | 4.4   |
| 8  | 284.0572 | 68.8  |
| 9  | 285.0598 | 10.4  |
| 10 | 286.0551 | 3.9   |
| 11 | 362.0707 | 11.0  |
| 12 | 379.1406 | 7.0   |
| 13 | 457.1043 | 4.3   |
| 14 | 523.1436 | 10.7  |
| 15 | 545.1250 | 100.0 |
| 16 | 546.1278 | 31.0  |
| 17 | 547.1245 | 13.9  |
| 18 | 613.1123 | 3.8   |
| 19 | 643.1229 | 4.3   |
| 20 | 828.1734 | 3.7   |

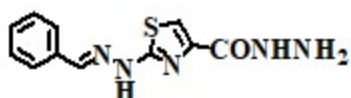

#### Generate Molecular Formula Parameters

| Charge | Tolerance | sigma limit | H/C Ratio | Electron Conf. | Nitrogen Rule | Chrom.BackGround | Calibration |
|--------|-----------|-------------|-----------|----------------|---------------|------------------|-------------|
| +1     | 6 ppm     | 0.08        | 3 - 0     | both           | false         | false            | TRUE        |

Expected Formula C11 H11 N5 O1 S1 Adduct(s): H, Na, NH4, C3H5N2, radical

| # | meas. m/z | theo. m/z | Err [ppm] | Sigma  | Formula      | Adduct | Adduct Mass |
|---|-----------|-----------|-----------|--------|--------------|--------|-------------|
| 1 | 282.0753  | 282.0757  | 1.60      | 0.0031 | C11H12N5OS   | M+H    | 1.0078      |
| 1 | 284.0572  | 284.0577  | 1.50      | 0.0024 | C11H11N5NaOS | M+Na   | 22.9898     |

Note: Sigma fits < 0.05 indicates high probability of correct MF

Figure S3: HRMS spectrum of BDTTC1

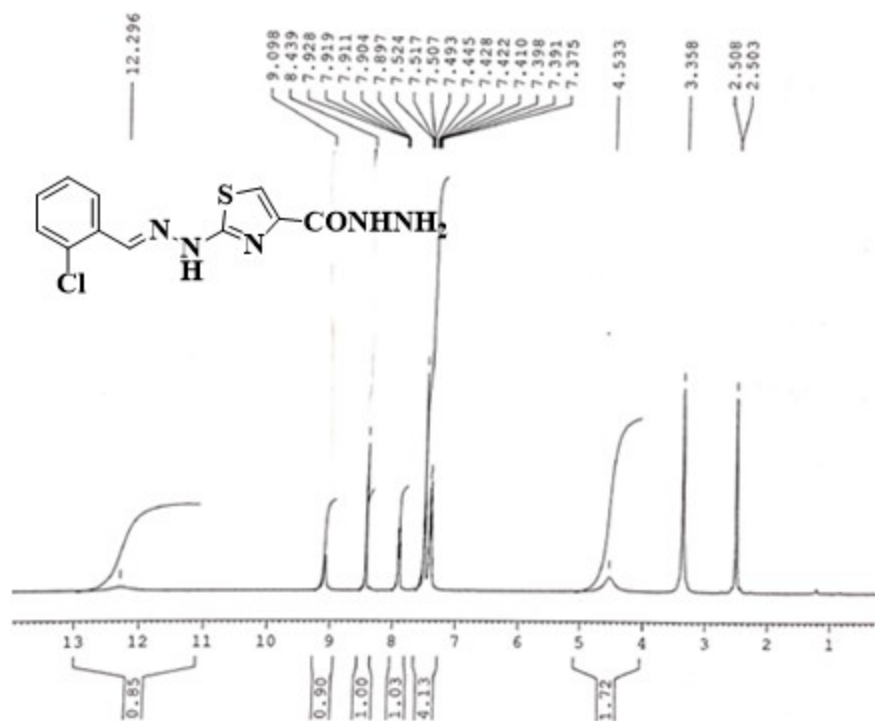

Figure S4:  $^1\text{H-NMR}$  spectrum of BDTC2

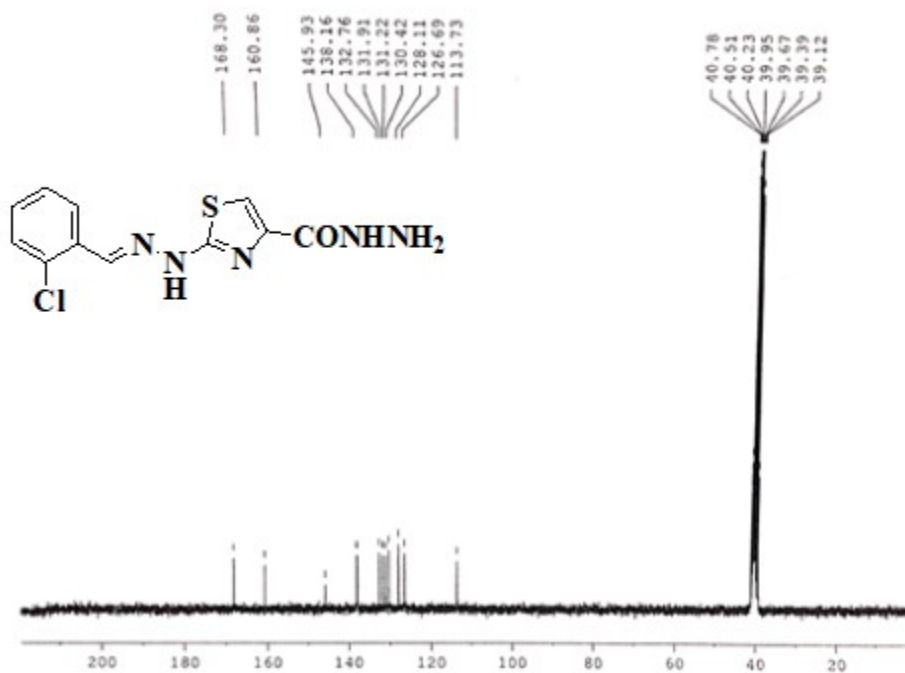

Figure S5:  $^{13}\text{C-NMR}$  spectrum of BDTC2

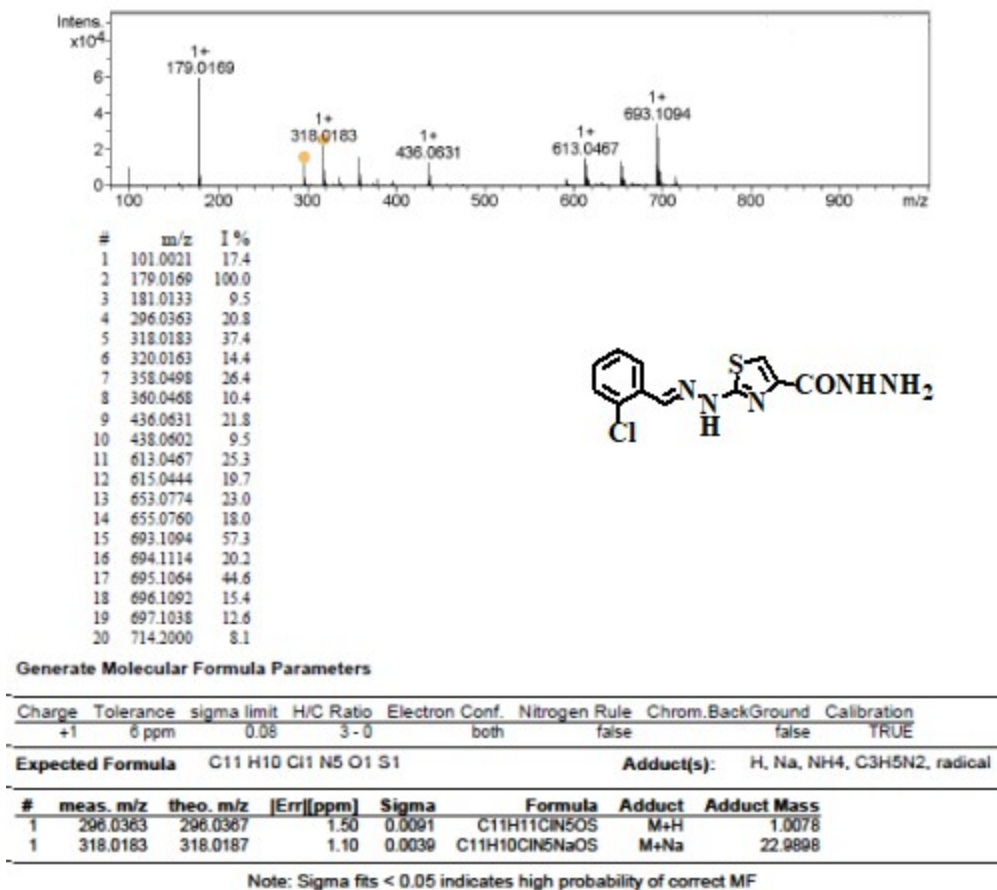

Figure S6: HRMS spectrum of BDTC2

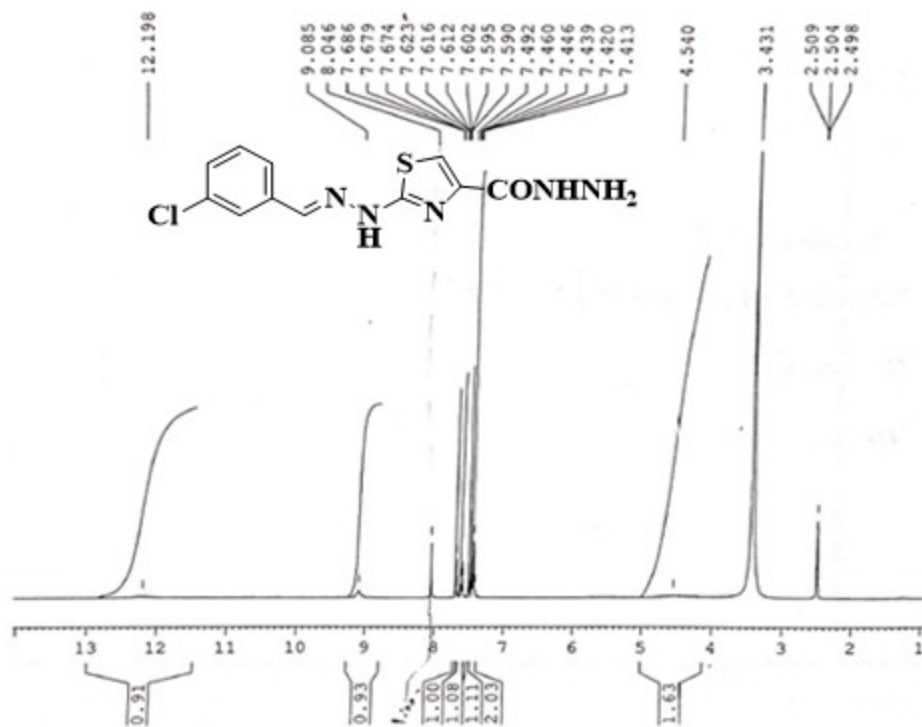

Figure S7: <sup>1</sup>H-NMR spectrum of BDTC3

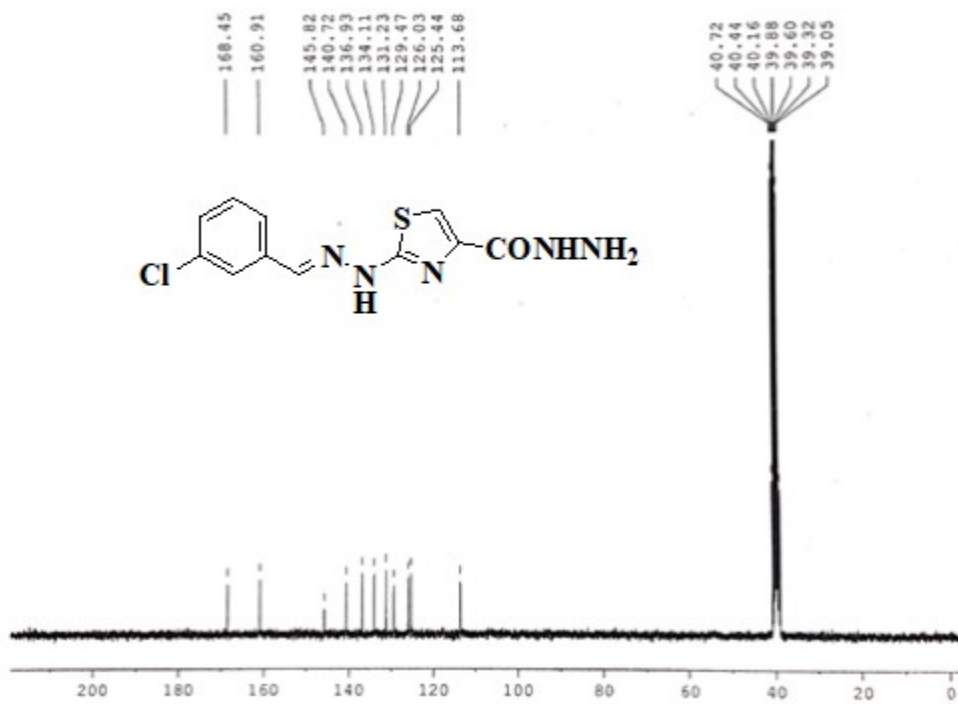

Figure S8: <sup>13</sup>C-NMR spectrum of BDTC3

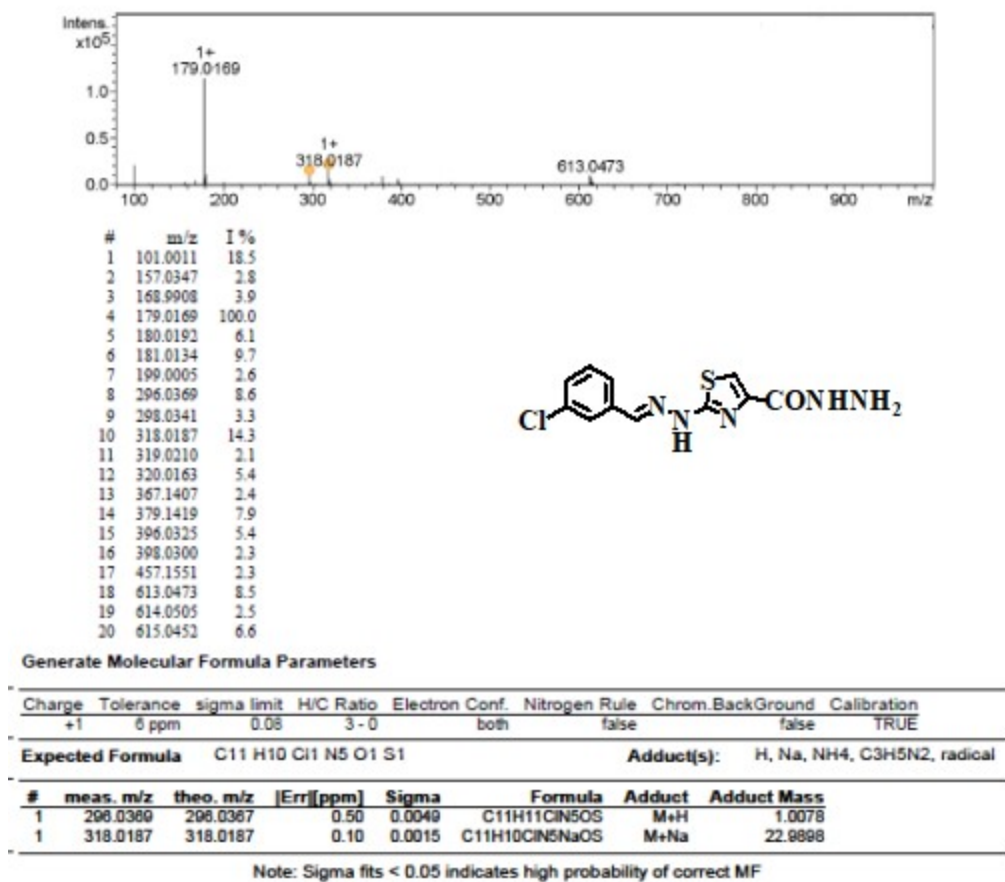

Figure S9: HRMS spectrum of BDTC3

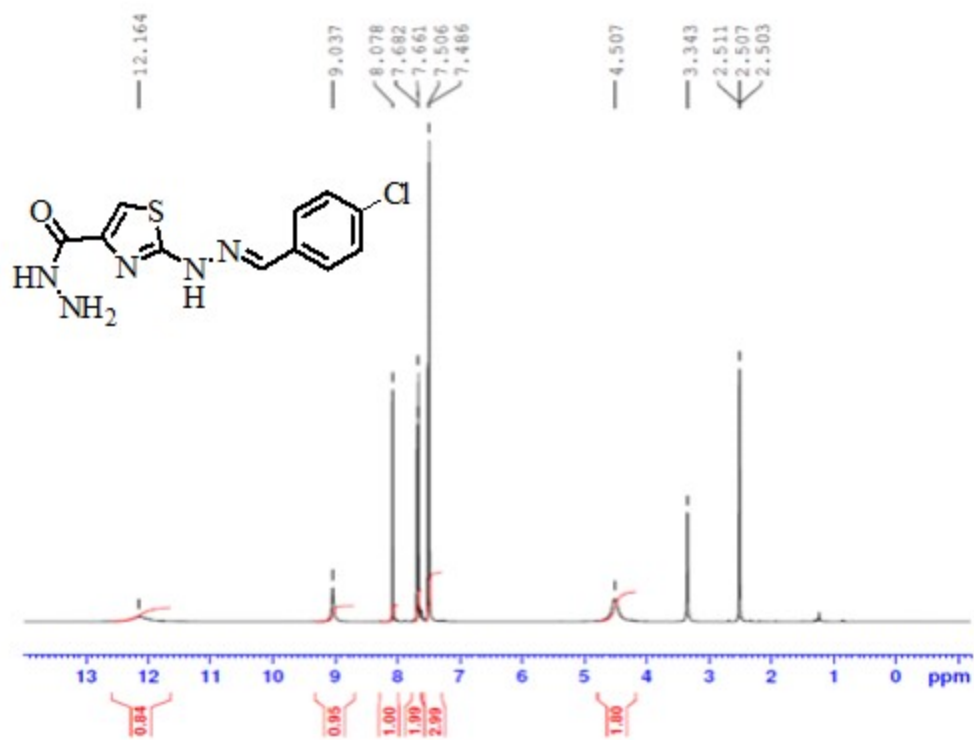

Figure S10: <sup>1</sup>H-NMR spectrum of BDTC4

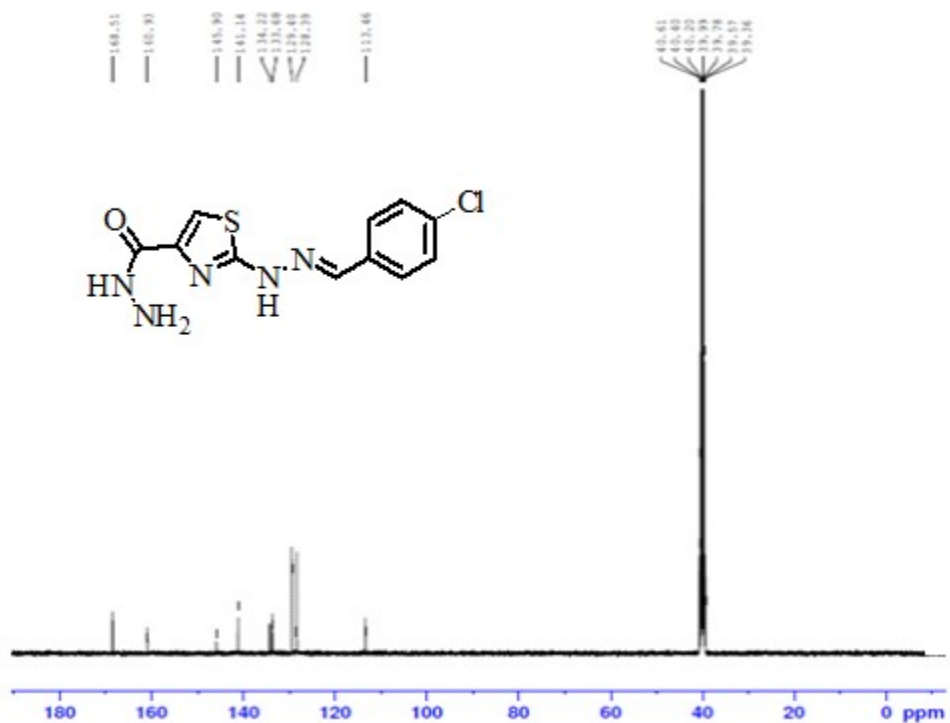

Figure S11: <sup>13</sup>C-NMR spectrum of BDTC4



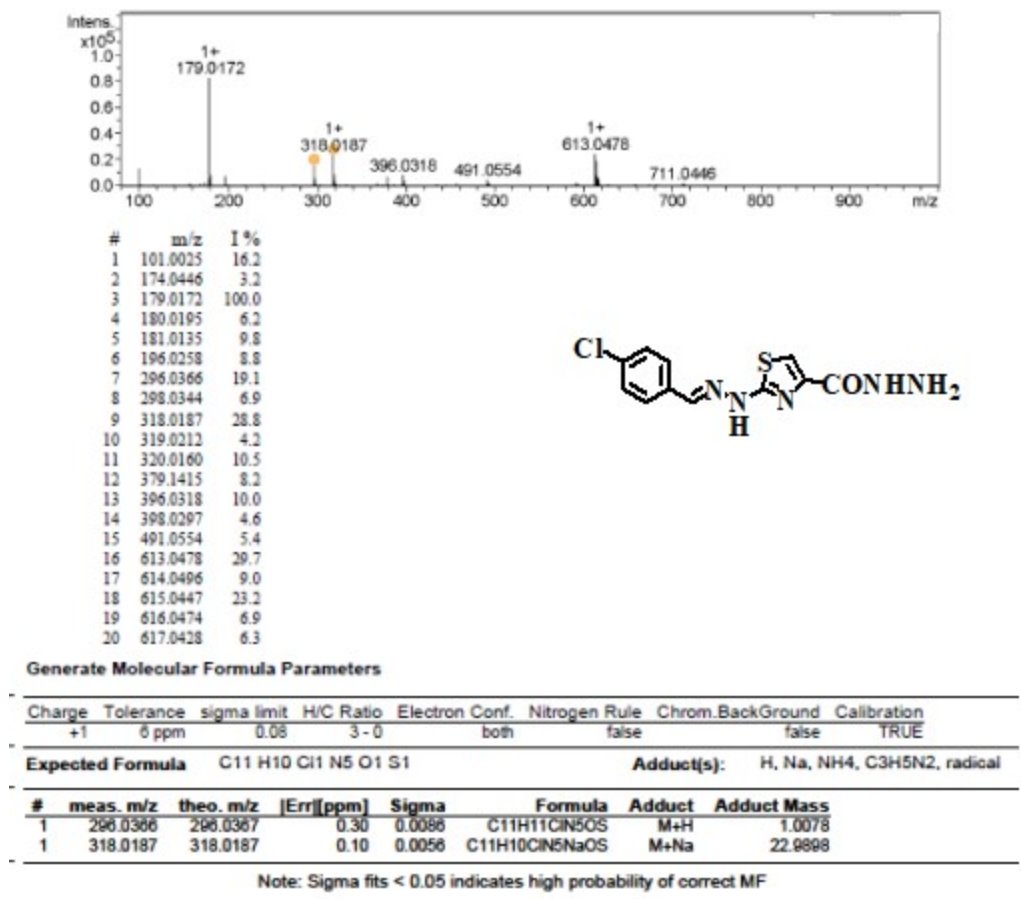

Figure S12: HRMS spectrum of BDTC4

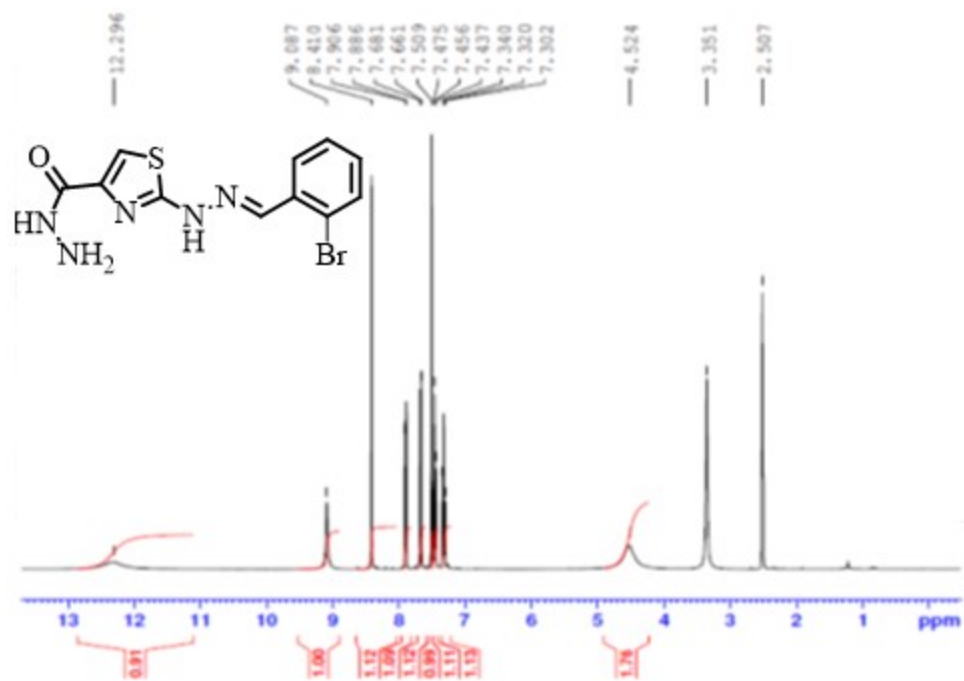

Figure S13: <sup>1</sup>H-NMR spectrum of BDTCS

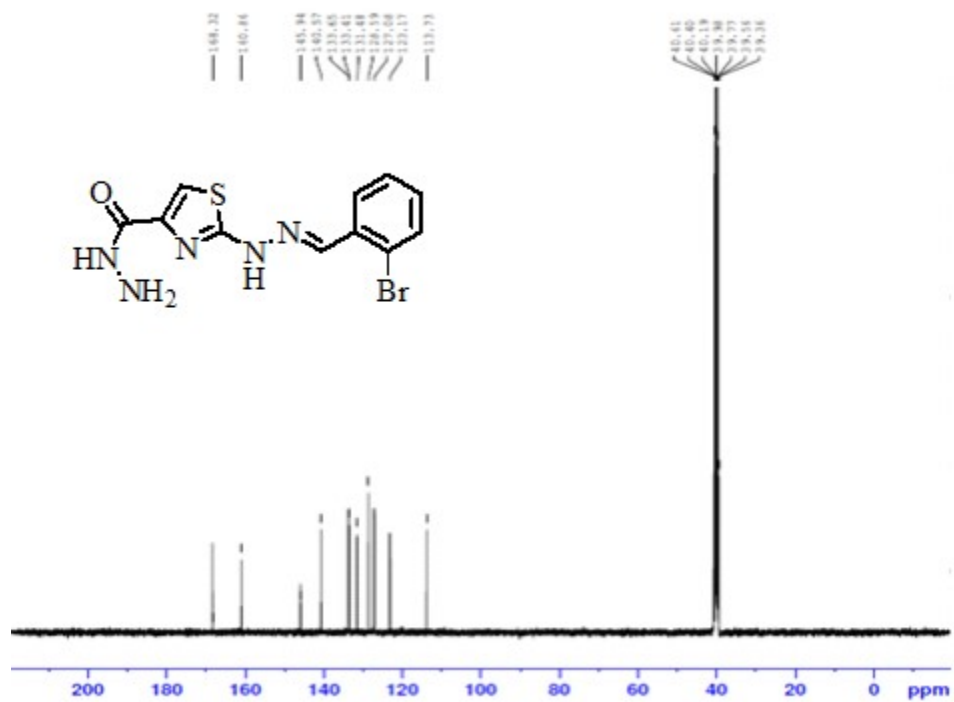

Figure S14: <sup>13</sup>C-NMR spectrum of BDTCS

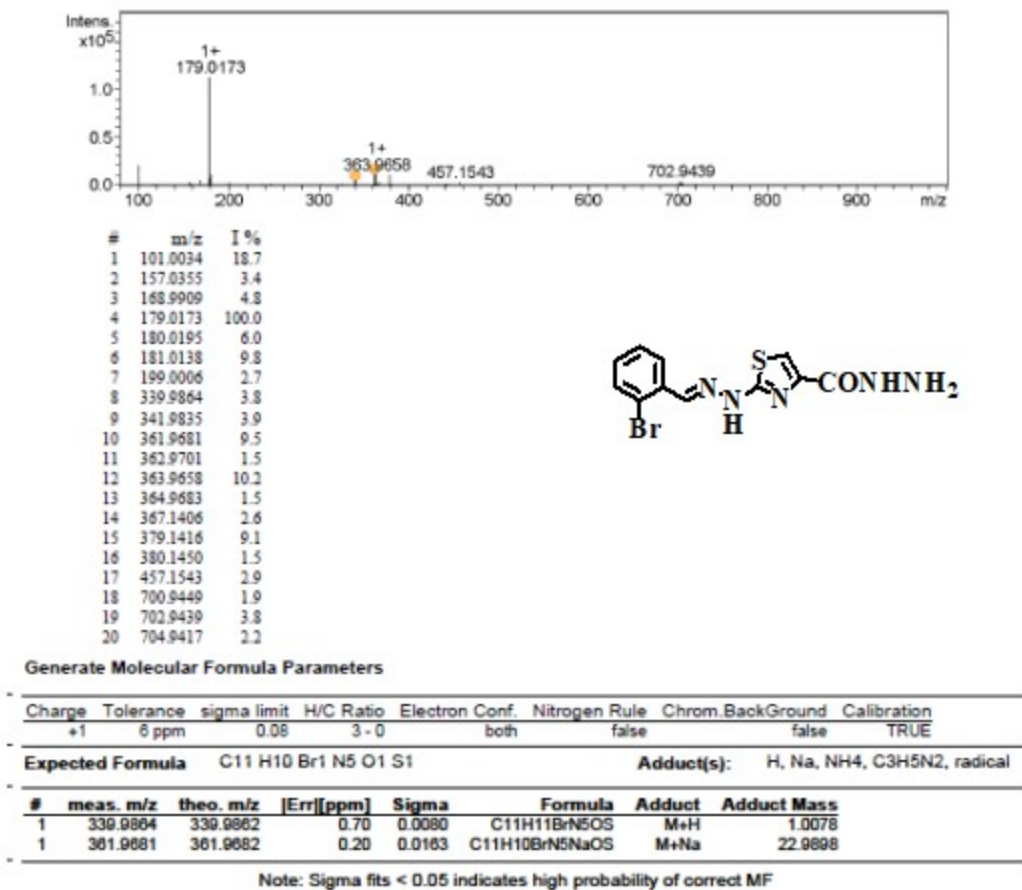

Figure S15: HRMS spectrum of BDTC5

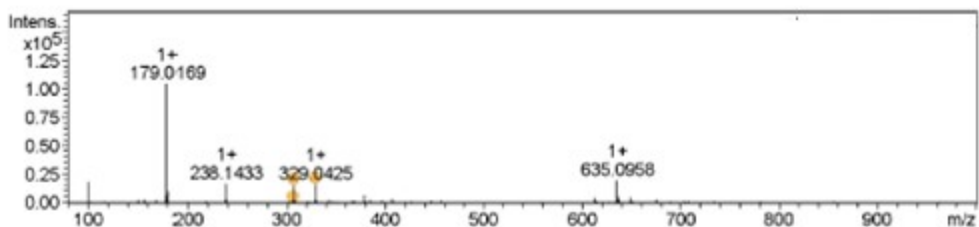

| #  | m/z      | I %   |
|----|----------|-------|
| 1  | 101.0019 | 18.1  |
| 2  | 157.0354 | 3.3   |
| 3  | 168.9904 | 2.6   |
| 4  | 179.0169 | 100.0 |
| 5  | 180.0192 | 6.1   |
| 6  | 181.0131 | 9.6   |
| 7  | 238.1433 | 16.6  |
| 8  | 239.1466 | 2.6   |
| 9  | 307.0608 | 15.0  |
| 10 | 329.0425 | 16.0  |
| 11 | 343.0467 | 2.8   |
| 12 | 379.1413 | 6.6   |
| 13 | 385.0741 | 2.7   |
| 14 | 407.0567 | 3.6   |
| 15 | 613.1126 | 4.0   |
| 16 | 635.0958 | 19.0  |
| 17 | 636.0980 | 5.7   |
| 18 | 637.0954 | 2.9   |
| 19 | 649.1007 | 4.4   |
| 20 | 675.1271 | 3.3   |

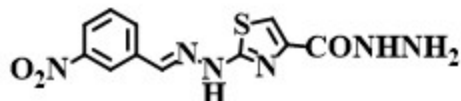

Generate Molecular Formula Parameters

| Charge                  | Tolerance | sigma limit      | H/C Ratio | Electron Conf. | Nitrogen Rule     | Chrom.BackGround | Calibration                 |
|-------------------------|-----------|------------------|-----------|----------------|-------------------|------------------|-----------------------------|
| +1                      | δ ppm     | 0.08             | 3 - 0     | both           | false             | false            | TRUE                        |
| <b>Expected Formula</b> |           | C11 H10 N6 O3 S1 |           |                | <b>Adduct(s):</b> |                  | H, Na, NH4, C3H5N2, radical |
| #                       | meas. m/z | theo. m/z        | Err [ppm] | Sigma          | Formula           | Adduct           | Adduct Mass                 |
| 1                       | 307.0608  | 307.0608         | 0.00      | 0.0025         | C11H11N6O3S       | M+H              | 1.0078                      |
| 1                       | 329.0425  | 329.0427         | 0.70      | 0.0043         | C11H10N6NaO3S     | M+Na             | 22.9898                     |

Note: Sigma fits < 0.05 indicates high probability of correct MF

Figure S16: <sup>1</sup>H-NMR spectrum of BDTC6

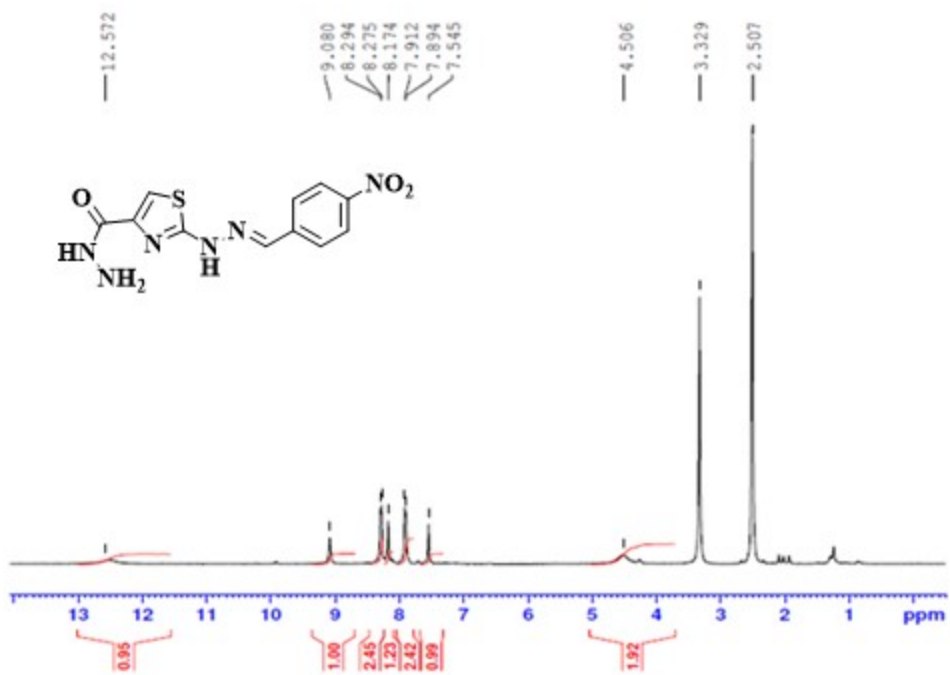

Figure S17: <sup>1</sup>H-NMR spectrum of BDTTC7

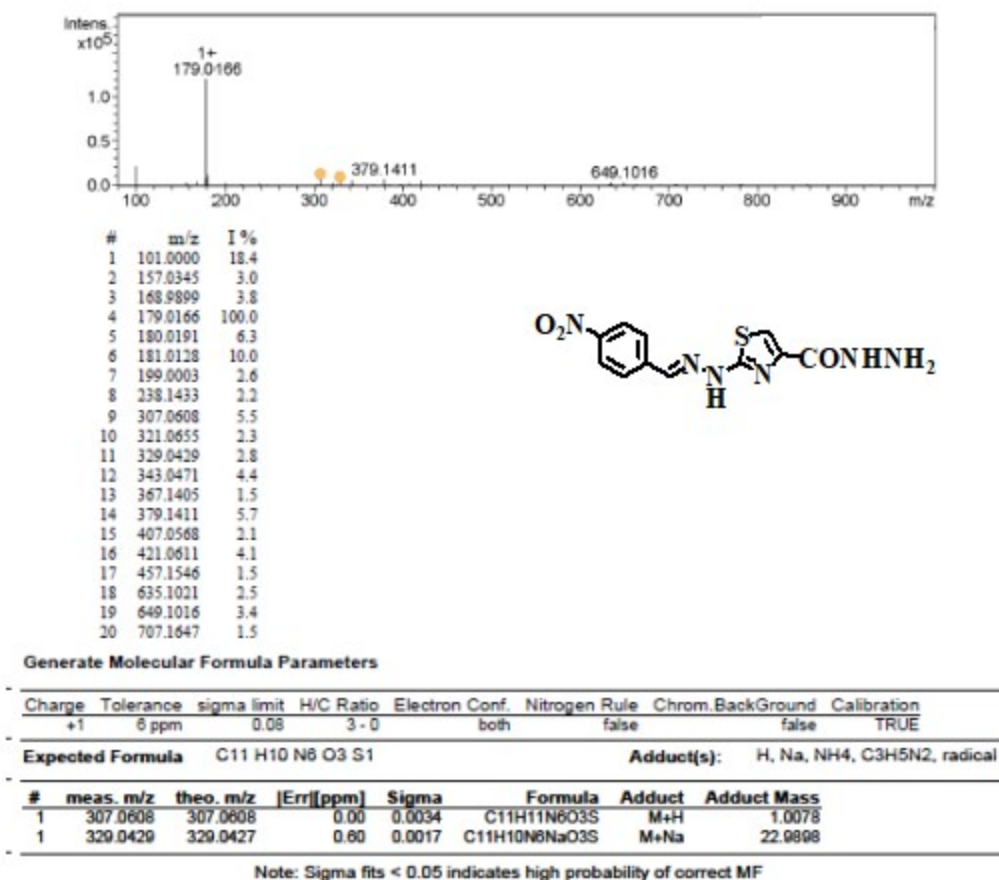

Figure S18: HRMS spectrum of BDTC7

## Spectroscopic data

### 2-(2-(2-Benzylidenehydrazinyl)thiazole-4-carbohydrazide (BDTC1)

Light green solid; Yield: 53%;  $R_f$ : 0.29 (acetone/*n*-hexane, 1:2); Melting point: 232-233°C; IR (ATR,  $\text{cm}^{-1}$ ): 3394 (-NH<sub>2</sub> stretching), 3310 (-NH stretching), 1666 (C=O stretching), 1473 (C-H bending, aliphatic), 1499, 1515, 1561, 1593 (C=C ring stretching), HRMS: calculated for C<sub>11</sub>H<sub>11</sub>N<sub>5</sub>OS: 261.0684 [M+H]<sup>+</sup>, found: 262.0753 [M+H]<sup>+</sup>, 284.0572 [M+Na]<sup>+</sup>, 545.1250 [2M+Na]<sup>+</sup>; <sup>1</sup>H-NMR (300 MHz):  $\delta$  12.11 (s, 1H, -N-NH-C-), 9.04 (s, -CO-NH-, 1H), 8.07 (s, 1H, -CH=N- azomethines), 7.65 (m, 2H, Ar-H), 7.41 (m, 4H, Ar-H+1,3-thiazole ring C-5), 4.49 (s, 2H, -NH<sub>2</sub>); <sup>13</sup>C-NMR (75 MHz):  $\delta$  168.6 (1,3-thiazole ring C-2), 160.9 (C=O), 145.9 (1,3-thiazole ring C-4), 142.4 (-CH=N- azomethine), 134.7, 129.9, 129.3, 126.8, 111.3 (Ar-C), 113.3 (1,3-thiazole ring C-5).

### 2-(2-(2-Chlorobenzylidene)hydrazinyl)thiazole-4-carbohydrazide (BDTC2)

Light green solid; Yield: 51%; Melting point: 250-251 °C;  $R_f$ : 0.27 (acetone/*n*-hexane, 1:2); IR (ATR,  $\text{cm}^{-1}$ ): 3433 (-NH<sub>2</sub> stretching), 3310 (-NH stretching), 1662 (C=O stretching), 1442 (C-H bending, aliphatic), 1581, 1556, 1511, 1497 (C=C ring stretching); HRMS: calculated for C<sub>11</sub>H<sub>10</sub>CIN<sub>5</sub>OS: 295.0295 [M+H]<sup>+</sup>, found: 296.0363 [M+H]<sup>+</sup>, 318.0183 [M+Na]<sup>+</sup>, 615.0444 [2M+Na]<sup>+</sup>; <sup>1</sup>H-NMR (300 MHz):  $\delta$  12.29 (s, 1H, -N-NH-C-), 9.09 (s, 1H, -CO-NH-), 8.43 (s, 1H, -CH=N- azomethine), 7.91 (m, 1H, Ar-H), 7.44 (m, 4H, Ar-H+1,3-thiazole ring C-5), 4.53 (s, 2H, -NH<sub>2</sub>); <sup>13</sup>C-NMR (75 MHz):  $\delta$  168.3 (1,3-thiazole ring C-2), 160.9 (C=O), 145.9 (1,3-thiazole ring C-4), 138.2 (-CH=N- azomethine), 132.8, 131.9, 131.2, 130.4, 128.1, 126.7 (Ar-C), 113.7 (1,3-thiazole ring C-5).

### **2-(2-(3-Chlorobenzylidene)hydrazinyl)thiazole-4-carbohydrazide (BDTC3)**

Light green solid; Yield: 55%; Melting point: 248-249 °C;  $R_f$ : 0.28 (acetone/*n*-hexane, 1:2); IR (ATR,  $\text{cm}^{-1}$ ): 3305 (-NH stretching), 1631 (C=O stretching), 1454 (C-H bending, aliphatic), 1599, 1570, 1521, 1502 (C=C ring stretching); HRMS: Calcd for C<sub>11</sub>H<sub>10</sub>CIN<sub>5</sub>OS: 295.0295 [M+H]<sup>+</sup>, found: 296.0369 [M+H]<sup>+</sup>, 318.0187 [M+Na]<sup>+</sup>, 615.0452 [2M+Na]<sup>+</sup>; <sup>1</sup>H-NMR (300 MHz):  $\delta$  12.19 (s, 1H, -N-NH-C-), 9.08 (s, 1H, -CO-NH-), 8.04 (s, 1H, -CH=N- azomethine), 7.68 (s, 1H, 1,3-thiazole ring C-5), 7.67 (m, 1H, Ar-H), 7.60 (m, 1H, Ar-H), 7.44 (m, 2H, Ar-H), 4.54 (s, 2H, -NH<sub>2</sub>); <sup>13</sup>C-NMR (75 MHz):  $\delta$  168.6 (1,3-thiazole ring C-2), 160.9 (C=O), 145.8 (1,3-thiazole ring C-4), 140.7 (-CH=N- azomethine), 136.9, 134.1, 131.2, 129.5, 126.0, 125.4 (Ar-C), 113.7 (1,3-thiazole ring C-5).

### **2-(2-(4-Chlorobenzylidene)hydrazinyl)thiazole-4-carbohydrazide (BDTC4)**

Light green solid; Yield: 48%; Melting point: 253-254 °C;  $R_f$ : 0.24 (acetone/*n*-hexane, 1:2); IR (ATR,  $\text{cm}^{-1}$ ): 3402 (-NH<sub>2</sub> stretching), 3309 (-NH stretching), 1608 (C=O stretching), 1465 (C-H bending, aliphatic), 1589, 1550, 1525, 1500 (C=C ring stretching); HRMS: Calcd for C<sub>11</sub>H<sub>10</sub>CIN<sub>5</sub>OS: 295.0295 [M+H]<sup>+</sup>, found: 296.0366 [M+H]<sup>+</sup>, 318.0187 [M+Na]<sup>+</sup>, 615.0447 [2M+Na]<sup>+</sup>; <sup>1</sup>H-NMR (300 MHz):  $\delta$  12.16 (s, 1H, -N-NH-C-), 9.03 (s, 1H, -CO-NH-), 8.07 (s, 1H, -CH=N- azomethine), 7.67 (d, 2H, Ar-H,  $J$  = 8.4 Hz), 7.45 (s, 1H, 1,3-thiazole ring C-5), 7.49 (d, 2H, Ar-H,  $J$  = 8.0 Hz), 4.50 (s, 2H, -NH<sub>2</sub>); <sup>13</sup>C-NMR (75 MHz):  $\delta$  168.5 (1,3-thiazole ring C-2), 160.9 (C=O), 145.9 (1,3-thiazole ring C-4), 141.1 (-CH=N- azomethine), 134.2, 133.7, 129.4, 128.4 (Ar-C), 113.5 (1,3-thiazole ring C-5).

### **2-(2-(2-Bromobenzylidene)hydrazinyl)thiazole-4-carbohydrazide (BDTC5)**

Light green solid; Yield: 54%; Melting point: 239-240 °C;  $R_f$ : 0.25 (acetone/*n*-hexane, 1:2); IR (ATR,  $\text{cm}^{-1}$ ): 3394 (-NH<sub>2</sub> stretching), 3298 (-NH stretching), 1658 (C=O stretching), 1435 (C-H bending, aliphatic), 1579, 1544, 1520, 1495 (C=C ring stretching); HRMS: Calcd for C<sub>11</sub>H<sub>10</sub>BrN<sub>5</sub>OS: 338.9789 [M+H]<sup>+</sup>, found: 339.9864 [M+H]<sup>+</sup>, 361.9681 [M+Na]<sup>+</sup>, 700.9449 [2M+Na]<sup>+</sup>; <sup>1</sup>H-NMR (400 MHz):  $\delta$  12.31 (s, 1H, -N-NH-C-), 9.08 (s, 1H, -CO-NH-), 8.41 (s, 1H, -CH=N- azomethine), 7.89 (d, 1H, Ar-H,  $J$ = 8.0 Hz), 7.67 (d, 1H, Ar-H,  $J$ = 8.0 Hz), 7.51 (s, 1H, 1,3-thiazole ring C-5), 7.45 (t, 1H, Ar-H,  $J$ = 7.6 Hz), 7.32 (t, 1H, Ar-H,  $J$ = 8.0 Hz), 4.52 (s, 2H, -NH<sub>2</sub>); <sup>13</sup>C-NMR (100 MHz):  $\delta$  168.3 (1,3-thiazole ring C-2), 160.9 (C=O), 145.9 (1,3-thiazole ring C-4), 140.6 (-CH=N- azomethine), 133.7, 133.4, 131.5, 128.6, 127.1, 123.2 (Ar-C), 113.7 (1,3-thiazole ring C-5).

### **2-(2-(3-Nitrobenzylidene)hydrazinyl)thiazole-4-carbohydrazide (BDTC6)**

Light green solid; Yield: 62%; Melting point: 258-259 °C;  $R_f$ : 0.29 (acetone/*n*-hexane, 1:2); IR (ATR,  $\text{cm}^{-1}$ ): 3375 (-NH<sub>2</sub> stretching), 3272 (-NH stretching), 1735 (C=O stretching), 1462 (C-H bending, aliphatic), 1589, 1561, 1523, 1501 (C=C ring stretching); HRMS: Calcd for C<sub>11</sub>H<sub>10</sub>N<sub>6</sub>O<sub>3</sub>S: 306.0535 [M+H]<sup>+</sup>, found: 307.0608 [M+H]<sup>+</sup>, 329.0425 [M+Na]<sup>+</sup>, 635.0958 [2M+Na]<sup>+</sup>; <sup>1</sup>H-NMR (400 MHz):  $\delta$  12.40 (s, 1H, -N-NH-C-), 9.06 (s, 1H, -CO-NH-), 8.10 (s, 1H, -CH=N- azomethine), 8.46 (s, 1H, Ar-H), 8.21 (d, 1H, Ar-H,  $J$ = 7.2 Hz), 8.09 (d, 1H, Ar-H,  $J$ = 7.6 Hz), 7.73 (t, 1H, Ar-H,  $J$ = 8.0 Hz), 7.52 (s, 1H, 1,3-thiazole ring C-5), 4.51 (s, 2H, -NH<sub>2</sub>); <sup>13</sup>C-NMR (100 MHz):  $\delta$  168.5 (1,3-thiazole ring C-2), 160.9 (C=O), 141.2 (-CH=N- azomethine), 134.0, 132.3, 128.6, 122.9 (Ar-C), 113.5 (1,3-thiazole ring C-5).

### **2-(2-(4-Nitrobenzylidene)hydrazinyl)thiazole-4-carbohydrazide (BDTC7)**

Light green solid; Yield: 55%; Melting point: 298-299 °C;  $R_f$ : 0.30 (acetone/*n*-hexane, 1:2); IR (ATR,  $\text{cm}^{-1}$ ): 3398 (-NH<sub>2</sub> stretching), 3282 (-NH stretching), 1728 (C=O stretching), 1454 (C-H bending, aliphatic), 1581, 1566, 1535, 1513 (C=C ring stretching); HRMS: Calcd for C<sub>11</sub>H<sub>10</sub>N<sub>6</sub>O<sub>3</sub>S: 306.0535 [M+H]<sup>+</sup>, found: 307.0608 [M+H]<sup>+</sup>, 329.0429 [M+Na]<sup>+</sup>, 635.1021 [2M+Na]<sup>+</sup>; <sup>1</sup>H-NMR (400 MHz):  $\delta$  12.57 (s, 1H, -N-NH-C-), 9.08 (s, 1H, -CO-NH-), 8.28 (d, 2H, Ar-H,  $J$ = 7.6 Hz), 8.17 (s, 1H, -CH=N- azomethine), 7.90 (d, 2H, Ar-H,  $J$ = 7.2 Hz), 7.54 (s, 1H, 1,3-thiazole ring C-5), 4.50 (s, 2H, -NH<sub>2</sub>); <sup>13</sup>C-NMR (100 MHz):  $\delta$  solubility issue.



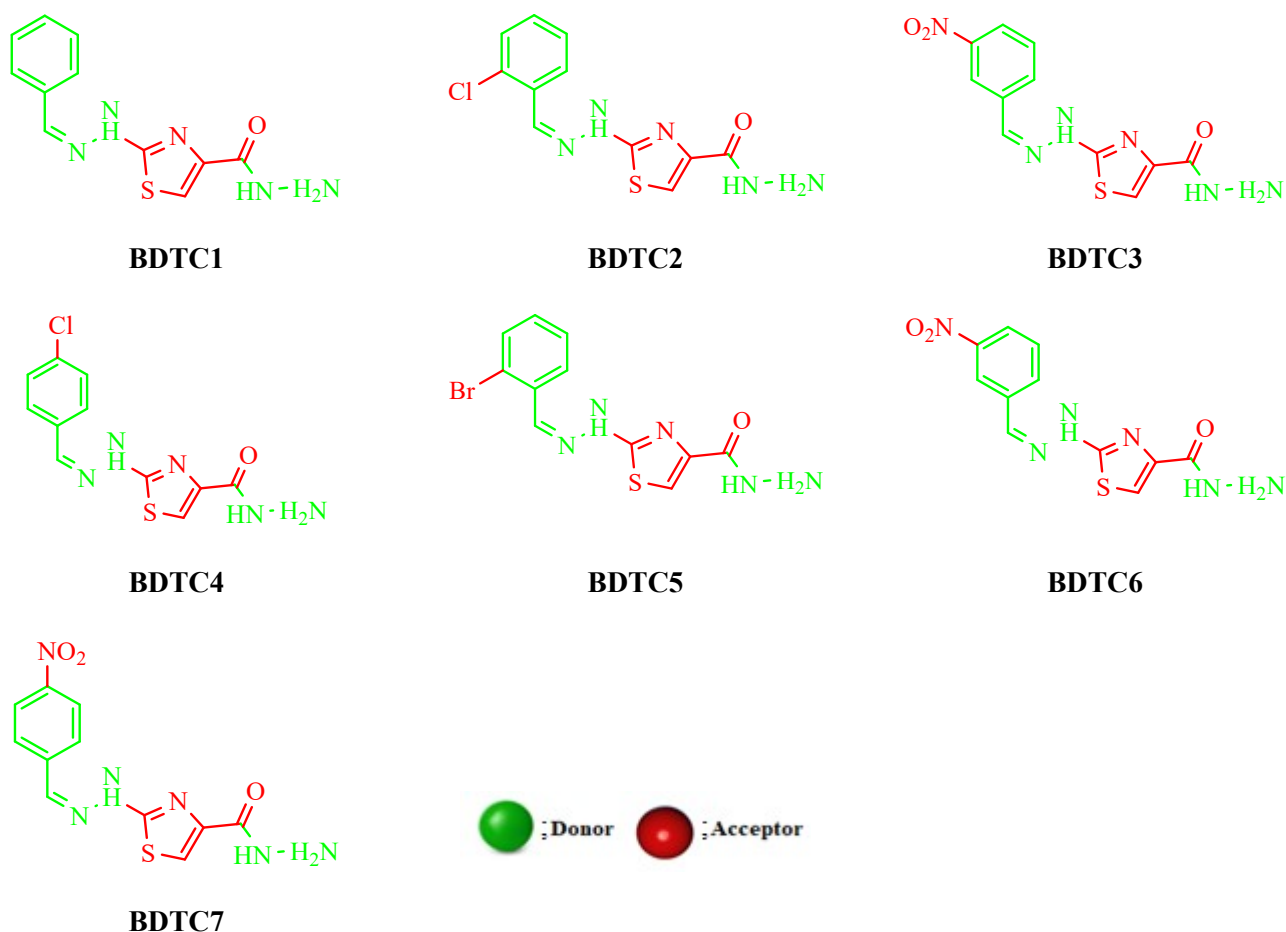

**Figure S19:** The optimized structures of **BDTTC1-BDTTC7** compounds.

**Table S1:** Wave length, excitation energy and oscillator strength of investigated compound **BDTTC1**.

| No. | $E$ (eV) | $\lambda_{\max}$ (nm) | $f$   | MO transitions                          |
|-----|----------|-----------------------|-------|-----------------------------------------|
| 1   | 372.593  | 3.328                 | 0.064 | H→L (96%)                               |
| 2   | 272.738  | 4.546                 | 0.043 | H-1→L (16%), H→L+1 (75%)                |
| 3   | 264.579  | 4.686                 | 0.015 | H-4→L (20%), H-1→L (26%), H→L+1 (11%)   |
| 4   | 262.567  | 4.722                 | 0.009 | H-2→L (12%), H-2→L+1 (44%), H→L+2 (16%) |
| 5   | 260.608  | 4.758                 | 0.071 | H-1→L (31%), H→L+2 (31%)                |
| 6   | 250.782  | 4.944                 | 0.022 | H-4→L (45%), H→L+2 (27%), H-6→L+2 (2%)  |

MO=molecular orbital, H=HOMO, L=LUMO,  $f$ = oscillator strength

**Table S2:** Wave length, excitation energy and oscillator strength of investigated compound **BDTTC2**.

| No. | $E$ (eV) | $\lambda_{\max}$ (nm) | $f$   | MO transitions                            |
|-----|----------|-----------------------|-------|-------------------------------------------|
| 1   | 362.888  | 3.417                 | 0.087 | H→L (97%)                                 |
| 2   | 274.581  | 4.515                 | 0.004 | H-3→L (15%), H→L+1 (23%), H→L+2 (54%)     |
| 3   | 270.962  | 4.576                 | 0.037 | H-2→L (21%), H→L+1 (54%), H→L+2 (12%)     |
| 4   | 262.946  | 4.715                 | 0.010 | H-2→L+1 (14%), H-1→L (25%), H-1→L+1 (45%) |
| 5   | 260.318  | 4.763                 | 0.018 | H-3→L (53%), H→L+2 (22%)                  |
| 6   | 258.365  | 4.799                 | 0.091 | H-2→L (31%), H-1→L (15%), H→L+1 (16%)     |

MO=molecular orbital, H=HOMO, L=LUMO, f= oscillator strength

**Table S3:** Wave length, excitation energy and oscillator strength of investigated compound **BDTC3**.

| No. | <i>E</i> (eV) | $\lambda_{\max}$ (nm) | <i>f</i> | MO transitions             |
|-----|---------------|-----------------------|----------|----------------------------|
| 1   | 380.180       | 3.261                 | 0.075    | H→L (96%)                  |
| 2   | 280.026       | 4.428                 | 0.026    | H-1→L (47%), H→L+1 (29%)   |
| 3   | 268.271       | 4.622                 | 0.020    | H-1→L (24%), H→L+1 (60%)   |
| 4   | 267.871       | 4.629                 | 0.048    | H-4→L (13%), H→L+2 (73%)   |
| 5   | 264.015       | 4.696                 | 0.001    | H-2→L (30%), H-2→L+1 (37%) |
| 6   | 257.005       | 4.824                 | 0.015    | H-4→L (37%), H→L+2 (14%)   |

MO=molecular orbital, H=HOMO, L=LUMO, f= oscillator strength

**Table S4:** Wave length, excitation energy and oscillator strength of investigated compound **BDTC4**.

| No. | <i>E</i> (eV) | $\lambda_{\max}$ (nm) | <i>f</i> | MO transitions                            |
|-----|---------------|-----------------------|----------|-------------------------------------------|
| 1   | 381.197       | 3.253                 | 0.076    | H→L (96%)                                 |
| 2   | 278.792       | 4.447                 | 0.029    | H-1→L (20%), H→L+1 (72%)                  |
| 3   | 271.259       | 4.571                 | 0.119    | H-1→L (37%), H→L+2 (51%)                  |
| 4   | 265.127       | 4.676                 | 0.042    | H-2→L+1 (12%), H-1→L (22%), H→L+2 (20%)   |
| 5   | 262.695       | 4.720                 | 0.025    | H-2→L (17%), H-2→L+1 (27%), H-2→L+2 (16%) |
| 6   | 254.467       | 4.872                 | 0.016    | H-2→L (66%), H-2→L+1 (13%)                |

MO=molecular orbital, H=HOMO, L=LUMO, f= oscillator strength

**Table S5:** Wave length, excitation energy and oscillator strength of investigated compound **BDTC5**.

| No. | <i>E</i> (eV) | $\lambda_{\max}$ (nm) | <i>f</i> | MO transitions                                          |
|-----|---------------|-----------------------|----------|---------------------------------------------------------|
| 1   | 360.902       | 3.435                 | 0.067    | H→L (97%)                                               |
| 2   | 276.226       | 4.489                 | 0.007    | H→L+1 (61%), H→L+2 (12%)                                |
| 3   | 269.818       | 4.595                 | 0.026    | H-2→L (10%), H→L+2 (74%), H-1→L (8%)                    |
| 4   | 263.847       | 4.699                 | 0.057    | H-3→L (11%), H-2→L+2 (11%), H-1→L (29%),<br>H→L+1 (22%) |
| 5   | 262.256       | 4.728                 | 0.015    | H-3→L (15%), H-2→L (16%), H-1→L+2 (25%)                 |
| 6   | 257.394       | 4.817                 | 0.054    | H-3→L (35%), H-1→L (13%), H→L+2 (10%)                   |

MO=molecular orbital, H=HOMO, L=LUMO, f= oscillator strength

**Table S6:** Wave length, excitation energy and oscillator strength of investigated compound **BDTC6**.

| No. | <i>E</i> (eV) | $\lambda_{\max}$ (nm) | <i>f</i> | MO transitions                          |
|-----|---------------|-----------------------|----------|-----------------------------------------|
| 1   | 382.809       | 3.239                 | 0.038    | H→L (93%), H→L+1 (5%)                   |
| 2   | 332.942       | 3.724                 | 0.058    | H→L+1 (91%), H→L (5%)                   |
| 3   | 311.581       | 3.979                 | 0.000    | H-9→L (87%), H-9→L+1 (7%), H-9→L+3 (3%) |
| 4   | 295.757       | 4.192                 | 0.013    | H-2→L (89%), H-5→L (3%)                 |
| 5   | 283.587       | 4.372                 | 0.000    | H-10→L (75%), H-10→L+1 (5%)             |
| 6   | 281.450       | 4.405                 | 0.000    | H-1→L (82%), H-10→L (5%)                |

MO=molecular orbital, H=HOMO, L=LUMO, f= oscillator strength

**Table S7:** Wave length, excitation energy and oscillator strength of investigated compound **BDTC7**.

| No. | <i>E</i> (eV) | $\lambda_{\max}$ (nm) | <i>f</i> | MO transitions        |
|-----|---------------|-----------------------|----------|-----------------------|
| 1   | 448.990       | 2.761                 | 0.070    | H→L (97%), H→L+1 (2%) |

|   |         |       |       |                                       |
|---|---------|-------|-------|---------------------------------------|
| 2 | 327.308 | 3.788 | 0.000 | H-9→L (86%), H-9→L+1 (11%)            |
| 3 | 311.604 | 3.979 | 0.079 | H-3→L (13%), H-2→L (29%), H-1→L (44%) |
| 4 | 307.531 | 4.032 | 0.028 | H-3→L (10%), H-2→L (26%), H-1→L (54%) |
| 5 | 295.729 | 4.193 | 0.043 | H-2→L (11%), H→L+1 (63%), H-10→L (6%) |
| 6 | 293.370 | 4.226 | 0.004 | H-10→L (81%), H-10→L+1 (10%)          |

MO=molecular orbital, H=HOMO, L=LUMO, f= oscillator strength

**Table S8:** Computed  $E_{\text{HOMO}}$ ,  $E_{\text{LUMO}}$  and energy gap ( $E_{\text{LUMO}}-E_{\text{HOMO}}$ ) of **BDTC1-BDTC7**.

| <b>Comp.</b> | $E_{\text{HOMO}}$ | $E_{\text{LUMO}}$ | $E_{\text{gap}}$ |
|--------------|-------------------|-------------------|------------------|
| <b>BDTC1</b> | -5.843            | -1.365            | 4.478            |
| <b>BDTC2</b> | -5.954            | -1.450            | 4.504            |
| <b>BDTC3</b> | -6.010            | -1.636            | 4.374            |
| <b>BDTC4</b> | -5.979            | -1.619            | 4.360            |
| <b>BDTC5</b> | -5.935            | -1.389            | 4.546            |
| <b>BDTC6</b> | -6.385            | -2.327            | 4.058            |
| <b>BDTC7</b> | -6.249            | -2.666            | 3.583            |

Units in *eV*
